## **Full title**

Risk of perinatal deaths for fetuses and early newborns with congenital heart defects

## **Authors' names, academic degrees, and affiliations**

Xu Zhou<sup>1\*</sup>, Yurong Jiang<sup>1\*</sup>, Junqun Fang<sup>1\*</sup>, Donghua Xie<sup>1</sup>

(all authors are doctors)

1 Hunan Provincial Maternal and Child Health Care Hospital, Changsha, Hunan Province, China

## **Short title**

Perinatal death risk for congenital heart defects

## **\* Corresponding author:**

Xu Zhou, E-mail: [chzhouxu@163.com](mailto:chzhouxu@163.com);

Junqun Fang, E-mail: [40112079@qq.com](mailto:40112079@qq.com);

Yurong Jiang, E-mail: [jyr0822@126.com](mailto:jyr0822@126.com)

**Complete address:** No. 53 Xiangchun Road, Changsha, Hunan Province

**The total word count:** 4222

1 **Abstract**

2 **Background**

3 Few studies assessed the perinatal death (PD) risk for congenital heart defects  
4 (CHDs).

5 **Methods**

6 Data were obtained from the Birth Defects Surveillance System in Hunan Province,  
7 China, 2016–2020. Perinatal mortality (stillbirths and early neonatal deaths per 1000  
8 fetuses ( $\geq 28$  weeks)) and 95% confidence intervals (CI) were calculated. Crude odds  
9 ratios (ORs) and 95%CI were calculated to estimate the PD risk for CHDs and to  
10 examine the association of each maternal characteristic with PD risk for CHDs.

11 **Results**

12 847755 fetuses were registered, including 14459 (1.71%) birth defects (4161 CHDs,  
13 0.49%) and 833296 (98.29%) cases without birth defects. 7445 PDs (6874 stillbirths  
14 and 571 early neonatal deaths) were identified, including 976 (13.11%) CHD-related  
15 deaths, and 4396 PDs for fetuses without birth defects. 97.50% (936/960) of  
16 CHD-related stillbirths were selective termination of pregnancy. The overall perinatal  
17 mortality was 0.88% (95%CI: 0.86-0.90). CHDs increased the PD risk (23.46% vs.  
18 0.53%, OR=57.78, 95%CI: 53.47-62.44). Any specific CHD increased the PD risk  
19 (OR>1, P<0.05). Perinatal mortality for CHDs was higher in rural than urban areas  
20 (OR= 3.40, 95%CI: 2.92-3.95). And perinatal mortalities for CHDs were higher in  
21 low maternal age (<25 years old), low per-capita annual income (<4000¥), low  
22 maternal education, no birth, and premature birth compared to the reference group.  
23 (OR>1, P<0.05).

24 **Conclusions**

25 CHDs significantly increase the PD risk. Several maternal characteristics were  
26 associated with CHD-related PDs. And several mechanisms have been proposed to  
27 explain these phenomena. Our results are of immediate value for clinical care and  
28 consultation.

29 **Keywords:** Perinatal Deaths; Perinatal Mortality; Congenital Abnormalities; Risk;  
30 Congenital Heart Defects

## 31 **1 Introduction**

32 Perinatal deaths were the combination of fetal and neonatal deaths, including infant  
33 deaths that occur at less than 7 days of age and fetal deaths with a stated or presumed  
34 period of gestation of 28 weeks or more (1). Severe birth defects significantly increase  
35 the perinatal death risk (2-11). Congenital heart defect (CHD) is typically defined as a  
36 structural abnormality of the heart and/or great vessels present at birth (12). CHD is  
37 the most common birth defect (12-14), and about 20%–25% of specific CHDs were  
38 considered severe (15-17).

39 CHD is one of the most critical risk factors for children's death, and most  
40 CHD-related deaths occur in low- and middle-income countries (18), which  
41 significantly burdens these countries. Previous studies have shown that CHDs  
42 increased the risk of adverse pregnancy outcomes, such as preterm birth, fetal brain  
43 damage and neonatal death (6, 19-25). And many studies regarded CHDs as adverse  
44 pregnancy outcomes (12, 13). However, few studies assessed the perinatal death risk  
45 for CHDs.

46 Notably, analysis of the epidemiology of perinatal death risk for CHDs has significant  
47 implications for clinical care and consultation. And it may contribute to reducing  
48 perinatal mortality.

49 Therefore, we conducted a comprehensive analysis based on the data from the Birth  
50 Defects Surveillance System in Hunan Province, south-central China (from 2016 to  
51 2020), to define the relationship between CHDs and perinatal deaths. This study  
52 aimed to provide information on intervention programs to reduce perinatal mortality.

## 53 **2 Methods**

### 54 **2.1 Data sources**

55 This study used data from the Birth Defects Surveillance System in Hunan Province,  
56 China, 2016–2020, which is run by the Hunan Provincial Health Commission and  
57 involves 52 representative registered hospitals in Hunan Province. Surveillance data  
58 of fetuses (births and deaths at 28 weeks of gestation and beyond) and all birth defects  
59 included demographic characteristics such as residence, gender, maternal age, and  
60 other key information. Perinatal deaths include stillbirths (fetal deaths with gestation  
61 of 28 weeks or more) and early neonatal deaths (infant deaths less than 7 days of age).

62 Perinatal mortality is the number of perinatal deaths per 1000 fetuses (births and  
63 deaths at 28 weeks of gestation and beyond).

64 Birth defects are diagnosed and classified according to the International Classification  
65 of Disease, Tenth Revision (ICD-10) (ICD codes: Q00-Q99), and ICD codes for  
66 CHDs were Q20-Q26.

67 To analyze the perinatal death risk of specific CHDs, if a fetus has more than one  
68 specific CHD, we consider only the major specific CHD according to the "Prognosis  
69 Grading and Perinatal Risk Assessment of Fetal Heart Disease" Expert Panel in China  
70 in 2022 ([26](#)).

## 71 **2.2 Informed consents**

72 We confirmed that informed consent was obtained from all subjects and/or their legal  
73 guardian(s). Doctors obtain consent from pregnant women before collecting  
74 surveillance data, witnessed by their families and the heads of the obstetrics or  
75 neonatal departments. Doctors obtain consent from their parents or guardians for live  
76 births, witnessed by their families and the heads of the obstetrics or neonatal  
77 departments. Since the Health Commission of Hunan Province collects those data,  
78 and the government has emphasized the privacy policy in the "Maternal and Child  
79 Health Monitoring Manual in Hunan Province", there is no additional written  
80 informed consent.

## 81 **2.3 Ethics guideline statement**

82 The Medical Ethics Committee of Hunan Provincial Maternal and Child Health Care  
83 Hospital approved the study. (NO: 2022-S64). It is a retrospective study of medical  
84 records; all data were fully anonymized before we accessed them. Moreover, we  
85 de-identified the patient records before analysis. We confirmed that all experiments  
86 were performed following relevant guidelines and regulations.

## 87 **2.4 Data quality control**

88 To carry out surveillance, the Hunan Provincial Health Commission formulated the  
89 "Maternal and Child Health Monitoring Manual in Hunan Province". Data were  
90 collected and reported by experienced doctors. To reduce integrity and information  
91 error rates of surveillance data, the Hunan Provincial Health Commission asked the

92 technical guidance departments to conduct comprehensive quality control each year.  
93 For some complicated combined CHD, we ask experienced experts to identify it.

## 94 **2.5 Materials and Data Availability**

95 We had full access to all the data in the study and takes responsibility for its integrity  
96 and the data analysis. All data generated or analyzed during this study are included in  
97 this published article.

## 98 **2.6 Statistical analysis**

99 Using the log-binomial method, we calculated the perinatal mortality and its 95%  
100 confidence intervals (CI). And we calculated crude odds ratios (ORs) to examine the  
101 association between perinatal deaths and a broad range of birth defects.

102 Statistical analyses were performed using SPSS 18.0 (IBM Corp., NY, USA).

## 103 **3 Results**

### 104 **3.1 Number of fetuses with or without CHDs**

105 Our study included 847755 fetuses, including 14459 (1.71%) cases with birth defects  
106 and 833296 (98.29%) cases without birth defects. And 4161 (0.49%) cases with  
107 CHDs. **Table 1** shows the details of fetuses with or without birth defects by year.  
108 (**Table 1**)

### 109 **3.2 CHD-related perinatal deaths**

110 7445 perinatal deaths were identified, including 6874 stillbirths and 571 early  
111 neonatal deaths. 976 CHD-related deaths were identified, accounting for 13.11% of  
112 perinatal deaths. And 4396 perinatal deaths were related to fetuses without birth  
113 defects. 97.50% (936/960) of CHD-related stillbirths were selective termination of  
114 pregnancy. **Table 2** shows the details of CHD-related perinatal deaths by year. (**Table**  
115 **2**)

### 116 **3.3 Perinatal mortality and perinatal death risk for CHDs**

117 The overall perinatal mortality was 0.88% (95%CI: 0.86-0.90). The perinatal  
118 mortality for fetuses with CHD was 23.46% (95%CI: 21.98,24.93), and perinatal  
119 mortality for fetuses without birth defects was 0.53% (95%CI: 0.51-0.54). Perinatal  
120 deaths were more common in fetuses with CHDs than fetuses without birth defects

121 (OR=57.78, 95%CI: 53.47-62.44). **Table 3** shows the details of perinatal death risk  
122 for CHDs by year. (**Table 3**)

### 123 **3.4 Perinatal mortality and perinatal death risk for specific CHDs**

124 Any specific CHD increased the perinatal death risk (OR>1, P<0.05). Ventricular  
125 septal defect (OR= 20.31, 95%CI: 17.66-23.35), atrial septal defect (OR= 5.31,  
126 95%CI: 3.12-9.04), and Tetralogy of Fallot (OR= 397.17, 95%CI: 280.32-562.75)  
127 were the most common specific CHDs. And Tetralogy of Fallot (OR= 397.17, 95%CI:  
128 280.32-562.75) and double outlet right ventricle (OR= 387.04, 95%CI: 223.49-670.27)  
129 were with the highest perinatal death risk. **Table 4** shows the details of perinatal  
130 mortality and perinatal death risk for specific CHDs. (**Table 4**)

### 131 **3.5 Epidemiology of perinatal death risk for CHDs**

132 Perinatal mortality for CHDs was higher in rural than urban areas (OR= 3.40, 95%CI:  
133 2.92-3.95). Compared to the reference group, perinatal mortalities for CHDs were  
134 higher in the following group (OR>1, P<0.05): low maternal age (<25 years old), low  
135 per-capita annual income (<4000 ¥), low maternal education, no birth, and premature  
136 birth. **Table 5** shows the details of perinatal death risk for CHDs by epidemiological  
137 characteristics. (**Table 5**).

## 138 **4 Discussion**

139 Overall, perinatal mortality for CHDs was relatively high. CHDs (including any  
140 specific CHD) significantly increased the perinatal death risk. And CHD-related  
141 perinatal deaths were more common in rural areas, mothers with low maternal age,  
142 low per-capita annual income, low maternal education, no birth, and premature birth.  
143 Our study is the first to systematically analyze the perinatal death risk for CHDs. Our  
144 results are of immediate value for clinical care and consultation.

145 CHDs significantly increased the perinatal death risk, and most CHD-related perinatal  
146 deaths were selective terminations of pregnancy. Previous studies showed birth  
147 defects increased perinatal death risk ([2](#), [8](#), [27](#), [28](#)). It is similar to ours. The perinatal  
148 mortality for CHDs (23.46%) was higher than the overall perinatal mortality for birth  
149 defects. E.g., Elisabeth et al. reported that 14% (1563/11353) of pregnancies with  
150 birth defects were ended by a second-trimester termination ([29](#)). Dominique et al.  
151 reported that 852 were stillborn in 19170 eligible neonates and fetuses with birth

152 defects (4.44%) (8). We also found any specific CHD increased the perinatal death  
153 risk. It is similar to previous studies (30, 31). And Tetralogy of Fallot and double outlet  
154 right ventricle had the highest perinatal death risk. It indicates that these specific  
155 CHDs are relatively more severe (24, 32-37). Our study is the first to systematically  
156 give the perinatal mortality and perinatal death risk (OR values) for specific CHDs.

157 We also found that CHD-related perinatal deaths were more common in rural areas,  
158 mothers with low maternal age, low per-capita annual income, low maternal education,  
159 no birth, and premature birth. And there are several mechanisms to explain these  
160 phenomena. First, low maternal age and no birth were associated indicators. Younger  
161 women are more likely to terminate a pregnancy with CHD because they can get  
162 pregnant again easily. In contrast, women of advanced age have difficulty conceiving  
163 and are more likely to keep fetuses with birth defects (38). Second, women in rural  
164 areas, low per-capita annual income, and low maternal education were also associated  
165 indicators. It may be mainly related to medical conditions and economic conditions.  
166 Better medical conditions and economic conditions benefit children with CHD  
167 surviving (39, 40). Third, as most CHD-related deaths were selective termination of  
168 pregnancy, the earlier pregnancy with birth defects is terminated, the less impact it  
169 will have on the pregnant woman (41, 42). It is the reason that perinatal deaths are  
170 more common in premature birth.

171 Some things could be improved in our study. E.g., many fetuses have more than one  
172 birth defect, but we do not analyze their combined effect.

173 In summary, perinatal mortality for CHDs was relatively high, and CHDs  
174 significantly increased the perinatal death risk. CHD-related perinatal deaths were  
175 more common in rural areas, mothers with low maternal age, low per-capita annual  
176 income, low maternal education, no birth, and premature birth. And several  
177 mechanisms have been proposed to explain these phenomena. Our results are of  
178 immediate value for clinical care and consultation.

## 179 **5 Acknowledgments**

180 The authors thank the staff working for the Birth Defects Surveillance System of  
181 Hunan Province, China, from 2016 to 2020.

## 182 **6 Sources of Funding**

183 No.

184 **7 Disclosures**

185 No.

186 **8 Supplemental Material**

187 Ethical approval.pdf



188 **9 Reference**

- 189 1. Barfield WD. Standard Terminology for Fetal, Infant, and Perinatal Deaths. *Pediatrics*.  
190 2016;137(5).
- 191 2. Liu Y, Li Q, Wang T, Zhang S, Chen L, Li Y, et al. Determinants for Perinatal Mortality  
192 in South China: A Prospective Cohort Study. *Frontiers in pediatrics*. 2022;10:756444.
- 193 3. Dai L, Zhou GX, Zhu J, Miao L, Wang YP, Wu YQ, et al. [Impacts of birth defects on  
194 perinatal deaths in Chinese population]. *Zhonghua Liu Xing Bing Xue Za Zhi*.  
195 2004;25(2):138-41.
- 196 4. Son SL, Allshouse AA, Page JM, Debbink MP, Pinar H, Reddy U, et al. Stillbirth and  
197 fetal anomalies: secondary analysis of a case-control study. *Bjog*. 2021;128(2):252-8.
- 198 5. Groen H, Bouman K, Pierini A, Rankin J, Rissmann A, Haeusler M, et al. Stillbirth and  
199 neonatal mortality in pregnancies complicated by major congenital anomalies: Findings from  
200 a large European cohort. *Prenat Diagn*. 2017;37(11):1100-11.
- 201 6. Zhang X, Sun Y, Zhu J, Zhu Y, Qiu L. Epidemiology, prenatal diagnosis, and neonatal  
202 outcomes of congenital heart defects in eastern China: a hospital-based multicenter study.  
203 *BMC Pediatr*. 2020;20(1):416.
- 204 7. Zhu J, Zhang J, Xia H, Ge J, Ye X, Guo B, et al. Stillbirths in China: a nationwide survey.  
205 *Bjog*. 2021;128(1):67-76.
- 206 8. Heinke D, Nestoridi E, Hernandez-Diaz S, Williams PL, Rich-Edwards JW, Lin AE, et al.  
207 Risk of Stillbirth for Fetuses With Specific Birth Defects. *Obstet Gynecol*.  
208 2020;135(1):133-40.
- 209 9. Lehtonen L, Gimeno A, Parra-Llorca A, Vento M. Early neonatal death: A challenge  
210 worldwide. *Semin Fetal Neonatal Med*. 2017;22(3):153-60.
- 211 10. Bakker MK, Kancherla V, Canfield MA, Bermejo-Sanchez E, Cragan JD, Dastgiri S, et  
212 al. Analysis of Mortality among Neonates and Children with Spina Bifida: An International  
213 Registry-Based Study, 2001-2012. *Paediatric and perinatal epidemiology*. 2019;33(6):436-48.
- 214 11. Johnson CY, Honein MA, Dana Flanders W, Howards PP, Oakley GP, Jr., Rasmussen SA.  
215 Pregnancy termination following prenatal diagnosis of anencephaly or spina bifida: a  
216 systematic review of the literature. *Birth defects research Part A, Clinical and molecular*  
217 *teratology*. 2012;94(11):857-63.
- 218 12. Liu Y, Chen S, Zühlke L, Black GC, Choy MK, Li N, et al. Global birth prevalence of  
219 congenital heart defects 1970-2017: updated systematic review and meta-analysis of 260  
220 studies. *Int J Epidemiol*. 2019;48(2):455-63.
- 221 13. Zhao L, Chen L, Yang T, Wang T, Zhang S, Chen L, et al. Birth prevalence of congenital  
222 heart disease in China, 1980-2019: a systematic review and meta-analysis of 617 studies. *Eur*  
223 *J Epidemiol*. 2020;35(7):631-42.
- 224 14. Ministry-of-Health-of-the-People's-Republic-of-China. The Chinese national report on  
225 birth defects 2012 [Available from:  
226 <http://www.gov.cn/gzdt/att/att/site1/20120912/1c6f6506c7f811bacf9301.pdf>.
- 227 15. Oster ME, Lee KA, Honein MA, Riehle-Colarusso T, Shin M, Correa A. Temporal trends  
228 in survival among infants with critical congenital heart defects. *Pediatrics*.  
229 2013;131(5):e1502-8.
- 230 16. Sun R, Liu M, Lu L, Zheng Y, Zhang P. Congenital Heart Disease: Causes, Diagnosis,  
231 Symptoms, and Treatments. *Cell Biochem Biophys*. 2015;72(3):857-60.

- 232 17. Bakker MK, Bergman JEH, Krikov S, Amar E, Cocchi G, Cragan J, et al. Prenatal  
233 diagnosis and prevalence of critical congenital heart defects: an international retrospective  
234 cohort study. *BMJ Open*. 2019;9(7):e028139.
- 235 18. GBD-2017-Congenital-Heart-Disease-Collaborators. Global, regional, and national  
236 burden of congenital heart disease, 1990-2017: a systematic analysis for the Global Burden of  
237 Disease Study 2017. *Lancet Child Adolesc Health*. 2020;4(3):185-200.
- 238 19. Matthiesen NB, Østergaard JR, Hjortdal VE, Henriksen TB. Congenital Heart Defects  
239 and the Risk of Spontaneous Preterm Birth. *J Pediatr*. 2021;229:168-74.e5.
- 240 20. Yan H, Zhai B, Feng R, Wang P, Zhang Y, Wang Y, et al. Prevalence of Congenital Heart  
241 Disease in Chinese Children With Different Birth Weights and Its Relationship to the  
242 Neonatal Birth Weight. *Front Pediatr*. 2022;10:828300.
- 243 21. Liu C, Lodge J, Flatley C, Gooi A, Ward C, Eagleson K, et al. Obstetric and perinatal  
244 outcomes in pregnancies with isolated foetal congenital heart abnormalities. *J Matern Fetal  
245 Neonatal Med*. 2019;32(18):2985-92.
- 246 22. Howell HB, Zaccario M, Kazmi SH, Desai P, Sklamberg FE, Mally P.  
247 Neurodevelopmental outcomes of children with congenital heart disease: A review. *Curr Probl  
248 Pediatr Adolesc Health Care*. 2019;49(10):100685.
- 249 23. Jaimes C, Rofeberg V, Stopp C, Ortinou CM, Gholipour A, Friedman KG, et al.  
250 Association of Isolated Congenital Heart Disease with Fetal Brain Maturation. *AJNR Am J  
251 Neuroradiol*. 2020;41(8):1525-31.
- 252 24. Xie D, Wang H, Liu Z, Fang J, Yang T, Zhou S, et al. Perinatal outcomes and congenital  
253 heart defect prognosis in 53313 non-selected perinatal infants. *PLoS One*.  
254 2017;12(6):e0177229.
- 255 25. Khalil A, Bennet S, Thilaganathan B, Paladini D, Griffiths P, Carvalho JS. Prevalence of  
256 prenatal brain abnormalities in fetuses with congenital heart disease: a systematic review.  
257 *Ultrasound Obstet Gynecol*. 2016;48(3):296-307.
- 258 26. Panel PGaPRAoFHDE. Consensus on the medical model and technical process of  
259 multidisciplinary diagnosis and treatment and precision integrated prevention and  
260 management of fetal heart disease in maternal-fetal medicine (Part I): Expert consensus on  
261 prognosis grading and perinatal risk assessment of fetal heart disease. *Chin J Perinat Med*.  
262 2022;25:321-5.
- 263 27. Qu Y, Chen S, Pan H, Zhu H, Yan C, Zhang S, et al. Risk factors of stillbirth in rural  
264 China: A national cohort study. *Scientific reports*. 2019;9(1):365.
- 265 28. Wu Z, Viisainen K, Wang Y, Hemminki E. Perinatal mortality in rural China:  
266 retrospective cohort study. *BMJ (Clinical research ed)*. 2003;327(7427):1319.
- 267 29. Svensson E, Ehrenstein V, Nørgaard M, Bakketeig LS, Rothman KJ, Sørensen HT, et al.  
268 Estimating the proportion of all observed birth defects occurring in pregnancies terminated by  
269 a second-trimester abortion. *Epidemiology (Cambridge, Mass)*. 2014;25(6):866-71.
- 270 30. Norman M, Håkansson S, Kusuda S, Vento M, Lehtonen L, Reichman B, et al. Neonatal  
271 Outcomes in Very Preterm Infants With Severe Congenital Heart Defects: An International  
272 Cohort Study. *J Am Heart Assoc*. 2020;9(5):e015369.
- 273 31. Pappas A, Shankaran S, Hansen NI, Bell EF, Stoll BJ, Laptook AR, et al. Outcome of  
274 extremely preterm infants (<1,000 g) with congenital heart defects from the National Institute

- 275 of Child Health and Human Development Neonatal Research Network. *Pediatr Cardiol.*  
276 2012;33(8):1415-26.
- 277 32. Smith CA, McCracken C, Thomas AS, Spector LG, St Louis JD, Oster ME, et al.  
278 Long-term Outcomes of Tetralogy of Fallot: A Study From the Pediatric Cardiac Care  
279 Consortium. *JAMA Cardiol.* 2019;4(1):34-41.
- 280 33. Chelliah A, Moon-Grady AJ, Peyvandi S, Chiu JS, Bost JE, Schidlow D, et al.  
281 Contemporary Outcomes in Tetralogy of Fallot With Absent Pulmonary Valve After Fetal  
282 Diagnosis. *J Am Heart Assoc.* 2021;10(12):e019713.
- 283 34. Christensen N, Andersen H, Garne E, Wellesley D, Addor MC, Haeusler M, et al.  
284 Atrioventricular septal defects among infants in Europe: a population-based study of  
285 prevalence, associated anomalies, and survival. *Cardiol Young.* 2013;23(4):560-7.
- 286 35. Pavlicek J, Gruszka T, Polanska S, Dolezalkova E, Matura D, Spacek R, et al. Parents'  
287 request for termination of pregnancy due to a congenital heart defect of the fetus in a country  
288 with liberal interruption laws. *J Matern Fetal Neonatal Med.* 2020;33(17):2918-26.
- 289 36. Nakashima Y, Mori Y, Sugiura H, Hirose E, Toyoshima K, Masutani S, et al. Very low  
290 birth weight infants with congenital heart disease: A multicenter cohort study in Japan. *J*  
291 *Cardiol.* 2022;80(4):344-50.
- 292 37. Anderson AW, Smith PB, Corey KM, Hill KD, Zimmerman KO, Clark RH, et al.  
293 Clinical outcomes in very low birth weight infants with major congenital heart defects. *Early*  
294 *Hum Dev.* 2014;90(12):791-5.
- 295 38. Frick AP. Advanced maternal age and adverse pregnancy outcomes. *Best Pract Res Clin*  
296 *Obstet Gynaecol.* 2021;70:92-100.
- 297 39. Lisonkova S, Haslam MD, Dahlgren L, Chen I, Synnes AR, Lim KI. Maternal morbidity  
298 and perinatal outcomes among women in rural versus urban areas. *CMAJ : Canadian Medical*  
299 *Association journal = journal de l'Association medicale canadienne.*  
300 2016;188(17-18):E456-e65.
- 301 40. Campbell MJ, Lorch S, Rychik J, Quartermain MD, Passarella M, Groeneveld PW.  
302 Socioeconomic barriers to prenatal diagnosis of critical congenital heart disease. *Prenatal*  
303 *diagnosis.* 2021;41(3):341-6.
- 304 41. Kapp N, Lohr PA. Modern methods to induce abortion: Safety, efficacy and choice. *Best*  
305 *practice & research Clinical obstetrics & gynaecology.* 2020;63:37-44.
- 306 42. LaFerla JJ. Midtrimester abortion: techniques and complications. *Clinics in perinatology.*  
307 1983;10(2):305-20.
- 308

309 **10 Tables**

310 **Table 1.** Number of fetuses with or without CHDs in Hunan Province, China,

311 2016-2020

| Year  | Total fetuses (n) | Fetuses without birth defects (n) | Proportion in total fetuses (%) | Fetuses                |                                 | Fetuses with CHDs (n) | Proportion in total fetuses (%) |
|-------|-------------------|-----------------------------------|---------------------------------|------------------------|---------------------------------|-----------------------|---------------------------------|
|       |                   |                                   |                                 | with birth defects (n) | Proportion in total fetuses (%) |                       |                                 |
| 2016  | 170688            | 167581                            | 98.18                           | 3107                   | 1.82                            | 823                   | 0.48                            |
| 2017  | 196316            | 192783                            | 98.20                           | 3533                   | 1.80                            | 1055                  | 0.54                            |
| 2018  | 177762            | 174862                            | 98.37                           | 2900                   | 1.63                            | 734                   | 0.41                            |
| 2019  | 164840            | 162197                            | 98.40                           | 2643                   | 1.60                            | 827                   | 0.50                            |
| 2020  | 138149            | 135873                            | 98.35                           | 2276                   | 1.65                            | 722                   | 0.52                            |
| Total | 847755            | 833296                            | 98.29                           | 14459                  | 1.71                            | 4161                  | 0.49                            |

312 **Abbreviation:** CHD= congenital heart defect

313 **Table 2.** CHD-related perinatal deaths in Hunan Province, China, 2016-2020

| Year  | Perinatal deaths (total) |                 |                           | Perinatal deaths related to fetuses without birth defects (n) |                                          |                 |                           | Birth defect-related deaths |                                          |                 |                           | CHD-related deaths |                                          |                 |                                        |                               |                           |
|-------|--------------------------|-----------------|---------------------------|---------------------------------------------------------------|------------------------------------------|-----------------|---------------------------|-----------------------------|------------------------------------------|-----------------|---------------------------|--------------------|------------------------------------------|-----------------|----------------------------------------|-------------------------------|---------------------------|
|       | Total (n)                | Stillbirths (n) | Early neonatal deaths (n) | Total (n)                                                     | Proportion in total perinatal deaths (%) | Stillbirths (n) | Early neonatal deaths (n) | Total (n)                   | Proportion in total perinatal deaths (%) | Stillbirths (n) | Early neonatal deaths (n) | Total (n)          | Proportion in total perinatal deaths (%) | Stillbirths (n) | Selective termination of pregnancy (n) | Proportion in stillbirths (%) | Early neonatal deaths (n) |
| 2016  | 1901                     | 1662            | 239                       | 1157                                                          | 60.86                                    | 918             | 239                       | 744                         | 39.14                                    | 744             | 0                         | 235                | 12.36                                    | 235             | 228                                    | 97.02                         | 0                         |
| 2017  | 1694                     | 1591            | 103                       | 1008                                                          | 59.50                                    | 905             | 103                       | 686                         | 40.50                                    | 686             | 0                         | 220                | 12.99                                    | 220             | 213                                    | 96.82                         | 0                         |
| 2018  | 1435                     | 1337            | 98                        | 828                                                           | 57.70                                    | 730             | 98                        | 607                         | 42.30                                    | 607             | 0                         | 195                | 13.59                                    | 195             | 185                                    | 94.87                         | 0                         |
| 2019  | 1293                     | 1222            | 71                        | 759                                                           | 58.70                                    | 712             | 47                        | 534                         | 41.30                                    | 510             | 24                        | 182                | 14.08                                    | 174             | 174                                    | 100.00                        | 8                         |
| 2020  | 1122                     | 1062            | 60                        | 644                                                           | 57.40                                    | 600             | 44                        | 478                         | 42.60                                    | 462             | 16                        | 144                | 12.83                                    | 136             | 136                                    | 100.00                        | 8                         |
| Total | 7445                     | 6874            | 571                       | 4396                                                          | 59.05                                    | 3865            | 531                       | 3049                        | 40.95                                    | 3009            | 40                        | 976                | 13.11                                    | 960             | 936                                    | 97.50                         | 16                        |

314 **Abbreviation:** CHD= congenital heart defect

315 **Table 3.** Perinatal mortality and perinatal death risk for CHDs by year

| Year  | Fetuses (total) |                      |                                  | Fetuses (with CHDs) |                      |                                  | Fetuses (without birth defects)<br>(Reference) |                      |                                  | OR (95%CI)         |
|-------|-----------------|----------------------|----------------------------------|---------------------|----------------------|----------------------------------|------------------------------------------------|----------------------|----------------------------------|--------------------|
|       | Total (n)       | Perinatal deaths (n) | Perinatal mortality (%<br>95%CI) | Total (n)           | Perinatal deaths (n) | Perinatal mortality (%<br>95%CI) | Total (n)                                      | Perinatal deaths (n) | Perinatal mortality (%<br>95%CI) |                    |
| 2016  | 170688          | 1901                 | 1.11(1.06,1.16)                  | 823                 | 235                  | 28.55(24.90,32.20)               | 167581                                         | 1157                 | 0.69(0.65,0.73)                  | 57.49(48.89-67.59) |
| 2017  | 196316          | 1694                 | 0.86(0.82,0.90)                  | 1055                | 220                  | 20.85(18.10,23.61)               | 192783                                         | 1008                 | 0.52(0.49,0.56)                  | 50.13(42.68-58.88) |
| 2018  | 177762          | 1435                 | 0.81(0.77,0.85)                  | 734                 | 195                  | 26.57(22.84,30.30)               | 174862                                         | 828                  | 0.47(0.44,0.51)                  | 76.04(63.68-90.81) |
| 2019  | 164840          | 1293                 | 0.78(0.74,0.83)                  | 827                 | 182                  | 22.01(18.81,25.20)               | 162197                                         | 759                  | 0.47(0.43,0.50)                  | 60.02(50.17-71.80) |
| 2020  | 138149          | 1122                 | 0.81(0.76,0.86)                  | 722                 | 144                  | 19.94(16.69,23.20)               | 135873                                         | 644                  | 0.47(0.44,0.51)                  | 52.31(42.90-63.79) |
| Total | 847755          | 7445                 | 0.88(0.86,0.90)                  | 4161                | 976                  | 23.46(21.98,24.93)               | 833296                                         | 4396                 | 0.53(0.51,0.54)                  | 57.78(53.47-62.44) |

316 **Abbreviation:** CHD= congenital heart defect; CI= confidence intervals; OR= crude odds ratio

317 **Table 4.** Perinatal mortality and perinatal death risk for specific CHDs

| Type of CHD (ICD codes)                     | Fetuses (n) | Perinatal deaths (n) | Perinatal mortality (%; 95%CI) | OR (95%CI)            |
|---------------------------------------------|-------------|----------------------|--------------------------------|-----------------------|
| Without birth defects                       | 833296      | 4396                 | 0.53(0.51-0.54)                | Reference             |
| Ventricular septal defect (Q21.0)           | 2345        | 228                  | 9.72(8.46-10.98)               | 20.31(17.66-23.35)    |
| Atrial septal defect (Q21.1)                | 511         | 14                   | 2.74(1.30-4.17)                | 5.31(3.12-9.04)       |
| Tetralogy of Fallot (Q21.3)                 | 146         | 99                   | 67.81(54.45-81.17)             | 397.17(280.32-562.75) |
| Atrioventricular septal defect (Q21.2)      | 89          | 31                   | 34.83(22.57-47.09)             | 100.78(65.10-156.03)  |
| Patent ductus arteriosus (Q25.0)            | 77          | 2                    | 2.60(-1.00-6.20)               | 5.03(1.23-20.48)      |
| Double outlet right ventricle (Q20.1)       | 58          | 39                   | 67.24(46.14-88.35)             | 387.04(223.49-670.27) |
| Stenosis of pulmonary artery (Q25.6)        | 56          | 32                   | 57.14(37.34-76.94)             | 251.41(147.97-427.17) |
| Congenital pulmonary valve stenosis (Q22.1) | 55          | 28                   | 50.91(32.05-69.77)             | 195.54(115.16-332.04) |
| Other                                       | 824         | 503                  | 61.04(55.71,66.38)             | 295.47(256.07-340.93) |

318 **Abbreviation:** CHD= congenital heart defect; CI= confidence intervals; OR= crude odds ratio; ICD= International Classification of Diseases

319 **Table 5.** Epidemiology of perinatal mortality and perinatal death risk for CHDs

| Characteristics                     | Fetuses with CHDs (n) | Perinatal deaths (n) | Perinatal mortality (% , 95%CI) | OR (95%CI)      |
|-------------------------------------|-----------------------|----------------------|---------------------------------|-----------------|
| <b>Region</b>                       |                       |                      |                                 |                 |
| Urban                               | 2342                  | 328                  | 14.01(12.49-15.52)              | Reference       |
| Rural                               | 1819                  | 648                  | 35.62(32.88-38.37)              | 3.40(2.92-3.95) |
| <b>Gender</b>                       |                       |                      |                                 |                 |
| Male                                | 2204                  | 514                  | 23.32(21.31-25.34)              | Reference       |
| Female                              | 1952                  | 457                  | 23.41(21.27-25.56)              | 1.01(0.87-1.16) |
| Unknown                             | 5                     | 5                    | 100.00(12.35-187.65)            | -               |
| <b>Maternal age (years old)</b>     |                       |                      |                                 |                 |
| <20                                 | 69                    | 32                   | 46.38(30.31-62.45)              | 2.92(1.80-4.76) |
| 20-24                               | 474                   | 176                  | 37.13(31.65-42.62)              | 2.00(1.61-2.48) |
| 25-29                               | 1700                  | 388                  | 22.82(20.55-25.09)              | Reference       |
| 30-34                               | 1270                  | 248                  | 19.53(17.10-21.96)              | 0.82(0.69-0.98) |
| >=35                                | 648                   | 132                  | 20.37(16.90-23.85)              | 0.87(0.69-1.08) |
| <b>Per-capita annual income (¥)</b> |                       |                      |                                 |                 |
| <2000                               | 36                    | 17                   | 47.22(24.77-69.67)              | 2.79(1.44-5.40) |
| 2000-                               | 367                   | 127                  | 34.60(28.59-40.62)              | 1.65(1.31-2.08) |
| 4000-                               | 1235                  | 219                  | 17.73(15.38-20.08)              | 0.67(0.57-0.80) |
| 8000-                               | 2523                  | 613                  | 24.30(22.37-26.22)              | Reference       |
| <b>Maternal education</b>           |                       |                      |                                 |                 |
| Illiteracy or primary school        | 50                    | 20                   | 40.00(22.47-57.53)              | 1.93(1.08-3.43) |



|                                |      |     |                     |                    |
|--------------------------------|------|-----|---------------------|--------------------|
| Secondary school               | 537  | 181 | 33.71(28.80-38.62)  | 1.47(1.19-1.82)    |
| Senior school                  | 1540 | 396 | 25.71(23.18-28.25)  | Reference          |
| University or above            | 2034 | 379 | 18.63(16.76-20.51)  | 0.66(0.56-0.78)    |
| Number of births               |      |     |                     |                    |
| 0                              | 38   | 30  | 78.95(50.70-107.20) | 12.62(5.75-27.72)  |
| 1                              | 2122 | 486 | 22.90(20.87-24.94)  | Reference          |
| 2                              | 1756 | 397 | 22.61(20.38-24.83)  | 0.98(0.85-1.14)    |
| ≥3                             | 245  | 63  | 25.71(19.36-32.06)  | 1.17(0.86-1.58)    |
| Gestational age of termination |      |     |                     |                    |
| <34 weeks                      | 910  | 701 | 77.03(71.33-82.74)  | 77.59(60.48-99.53) |
| 34-36 weeks                    | 717  | 170 | 23.71(20.15-27.27)  | 7.19(5.54-9.33)    |
| ≥37 weeks                      | 2534 | 105 | 4.14(3.35-4.94)     | Reference          |

320 **Abbreviation:** CHD= congenital heart defect; CI= confidence intervals; OR= crude  
 321 odds ratio
